# Supplementary material for: Prognostic Relevance of Cardiopulmonary Exercise Testing for Patients with Chronic Thromboembolic Pulmonary Hypertension
Source: MDPI journal article supplement (doi:10.3390/jcdd9100333), 2022-10-01
Supplement: s1 [file s1]

## **Supplemental Material**

### **Prognostic Relevance of Cardiopulmonary Exercise Testing for Patients With Chronic Thromboembolic Pulmonary Hypertension**

Table S1. Cox Regression Analysis Adjusted for Age and Sex.

| Parameter                                               | n   | Total Population<br>HR (95% CI) | Non-Surgical<br>Treatment (n = 207)<br>HR (95% CI) | Surgical Treatment<br>(n = 138)<br>HR (95% CI) |
|---------------------------------------------------------|-----|---------------------------------|----------------------------------------------------|------------------------------------------------|
| Height                                                  | 341 | 0.92 (0.68; 1.26)               | 0.91 (0.63; 1.29)                                  | 1.38 (0.72; 2.66)                              |
| Weight                                                  | 345 | 0.63 (0.47; 0.84)*              | 0.63 (0.46; 0.87)*                                 | 0.67 (0.36; 1.28)                              |
| Body mass index                                         | 341 | 0.63 (0.47; 0.84)*              | 0.62 (0.45; 0.86)*                                 | 0.57 (0.30; 1.07)                              |
| PAH medical treatment                                   | 345 | 0.92 (0.58; 1.47)               | 0.88 (0.51; 1.49)                                  | 0.56 (0.19; 1.64)                              |
| WHO functional class at diagnosis<br>III & IV vs I & II | 311 | 2.67 (1.40; 5.08)*              | 2.58 (1.22; 5.48)*                                 | 2.56 (0.73; 8.95)                              |
| 6-MWD at diagnosis                                      | 182 | 0.74 (0.54; 1.03)               | 0.77 (0.53; 1.14)                                  | 0.73 (0.34; 1.56)                              |
| <b>Comorbidities</b>                                    |     |                                 |                                                    |                                                |
| Arterial hypertension                                   | 318 | 0.68 (0.43; 1.10)               | 0.63 (0.37; 1.09)                                  | 0.87 (0.32; 2.34)                              |
| Venous thromboembolism                                  | 208 | 1.27 (0.68; 2.35)               | 0.91 (0.46; 1.81)                                  | 3.15 (0.65; 15.31)                             |
| Atrial fibrillation                                     | 281 | 0.82 (0.49; 1.38)               | 0.86 (0.50; 1.48)                                  | 0.36 (0.04; 2.94)                              |
| Chronic renal failure                                   | 317 | 1.30 (0.81; 2.08)               | 1.12 (0.64; 1.94)                                  | 2.05 (0.78; 5.41)                              |
| Diabetes mellitus                                       | 316 | 1.84 (1.05; 3.21)*              | 1.43 (0.75; 2.72)                                  | 3.49 (1.06; 11.53)*                            |
| Coronary artery disease                                 | 317 | 1.08 (0.65; 1.82)               | 1.90 (1.08; 3.34)*                                 | 0.20 (0.04; 0.93)*                             |
| COPD/asthma                                             | 218 | 1.29 (0.65; 2.54)               | 0.88 (0.38; 2.01)                                  | 4.12 (1.12; 15.18)*                            |
| Malignancy                                              | 272 | 0.81 (0.44; 1.49)               | 0.76 (0.38; 1.53)                                  | 1.07 (0.28; 3.99)                              |
| Peripheral artery disease                               | 170 | 2.12 (0.80; 5.60)               | 1.87 (0.71; 4.95)                                  | -                                              |
| Interstitial lung disease                               | 307 | 2.15 (0.86; 5.40)               | 2.05 (0.80; 5.26)                                  | -                                              |
| <b>Echocardiography</b>                                 |     |                                 |                                                    |                                                |
| LVEF                                                    | 242 | 0.90 (0.66; 1.22)               | 0.90 (0.61; 1.34)                                  | 0.98 (0.56; 1.72)                              |
| TAPSE                                                   | 253 | 0.70 (0.53; 0.91)*              | 0.69 (0.51; 0.94)*                                 | 0.76 (0.34; 1.35)                              |
| Estimated RVSP                                          | 232 | 1.30 (1.01; 1.66)*              | 1.47 (1.08; 2.00)*                                 | 1.05 (0.65; 1.70)                              |
| <b>Right heart catheterization</b>                      |     |                                 |                                                    |                                                |
| RAPm                                                    | 315 | 1.15 (0.91; 1.46)               | 1.22 (0.93; 1.61)                                  | 0.92 (0.54; 1.58)                              |

| Parameter                               | n   | Total Population   | Non-Surgical Treatment (n = 207) | Surgical Treatment (n = 138) |
|-----------------------------------------|-----|--------------------|----------------------------------|------------------------------|
|                                         |     | HR (95% CI)        | HR (95% CI)                      | HR (95% CI)                  |
| PAPm                                    | 345 | 1.33 (1.08; 1.64)* | 1.41 (1.12; 1.78)*               | 1.03 (0.63; 1.70)            |
| PVR                                     | 292 | 1.21 (0.97; 1.51)  | 1.29 (1.01; 1.67)*               | 0.98 (0.60; 1.61)            |
| TPR                                     | 294 | 1.30 (1.04; 1.61)* | 1.26 (0.99; 1.60)                | 1.25 (0.75; 2.08)            |
| Cardiac index                           | 294 | 0.77 (0.58; 1.02)  | 0.79 (0.59; 1.07)                | 0.73 (0.37; 1.43)            |
| SvO <sub>2</sub>                        | 243 | 0.87 (0.69; 1.11)  | 0.61 (0.43; 0.86)*               | 1.20 (0.66; 2.19)            |
| <b>Pulmonary function test</b>          |     |                    |                                  |                              |
| TLC (% pred.)                           | 303 | 0.89 (0.70; 1.13)  | 0.96 (0.74; 1.25)                | 0.99 (0.53; 1.86)            |
| FVC (% pred.)                           | 312 | 0.81 (0.64; 1.03)  | 0.87 (0.67; 1.15)                | 0.81 (0.47; 1.40)            |
| FEV1 (% pred.)                          | 316 | 0.73 (0.57; 0.93)* | 0.81 (0.62; 1.06)                | 0.62 (0.35; 1.08)            |
| FEV1/FVC (%)                            | 312 | 0.79 (0.61; 1.01)  | 0.89 (0.68; 1.18)                | 0.51 (0.30; 0.89)*           |
| RV (% pred.)                            | 302 | 1.08 (0.87; 1.35)  | 1.10 (0.87; 1.39)                | 1.31 (0.79; 2.17)            |
| RV/TLC (% pred.)                        | 289 | 1.18 (0.92; 1.52)  | 1.05 (0.79; 1.41)                | 2.00 (0.93; 4.29)            |
| DLCO (% pred.)                          | 176 | 0.69 (0.51; 0.93)* | 0.74 (0.53; 1.01)                | 0.75 (0.37; 1.53)            |
| KCO (% pred.)                           | 271 | 0.60 (0.48; 0.75)* | 0.64 (0.51; 0.82)*               | 0.54 (0.31; 0.92)*           |
| <b>Cardiopulmonary exercise testing</b> |     |                    |                                  |                              |
| Max. work rate (% pred.)                | 325 | 0.62 (0.47; 0.84)* | 0.63 (0.44; 0.91)*               | 0.64 (0.36; 1.14)            |
| VO <sub>2</sub> peak/kg                 | 328 | 0.65 (0.49; 0.86)* | 0.59 (0.42; 0.84)*               | 0.74 (0.43; 1.28)            |
| VO <sub>2</sub> peak (% pred.)          | 328 | 0.55 (0.41; 0.75)* | 0.49 (0.34; 0.70)*               | 0.61 (0.33; 1.12)            |
| VO <sub>2</sub> /heart rate max.        | 323 | 0.62 (0.47; 0.82)* | 0.63 (0.46; 0.87)*               | 0.54 (0.29; 1.01)            |
| VE/VCO <sub>2</sub> slope               | 275 | 1.32 (1.03; 1.68)* | 1.59 (1.16; 2.18)*               | 1.11 (0.69; 1.79)            |
| VE/VCO <sub>2</sub> at rest             | 286 | 1.26 (0.99; 1.59)  | 1.40 (1.04; 1.87)*               | 1.12 (0.73; 1.71)            |
| VE/VCO <sub>2</sub> at VT1              | 250 | 1.18 (0.94; 1.49)  | 1.41 (1.03; 1.95)*               | 1.02 (0.67; 1.55)            |
| PETCO <sub>2</sub> at rest              | 282 | 0.78 (0.61; 0.99)* | 0.75 (0.56; 0.99)*               | 0.77 (0.46; 1.31)            |
| PETCO <sub>2</sub> at VT1               | 249 | 0.77 (0.59; 1.01)  | 0.72 (0.52; 0.99)*               | 0.78 (0.46; 1.33)            |
| P(A-a)O <sub>2</sub> max.               | 175 | 1.14 (0.86; 1.52)  | 1.06 (0.74; 1.50)                | 1.47 (0.84; 2.58)            |

| Parameter                   | n   | Total Population  | Non-Surgical Treatment (n = 207) | Surgical Treatment (n = 138) |
|-----------------------------|-----|-------------------|----------------------------------|------------------------------|
|                             |     | HR (95% CI)       | HR (95% CI)                      | HR (95% CI)                  |
| P(a-ET)CO <sub>2</sub> peak | 175 | 1.27 (0.96; 1.69) | 1.39 (1.01; 1.91)*               | 1.18 (0.61; 2.29)            |
| VE/MVV (%)                  | 286 | 0.71 (0.49; 1.03) | 0.85 (0.55; 1.30)                | 0.70 (0.32; 1.53)            |
| PaO <sub>2</sub> at rest    | 268 | 0.54 (0.18; 1.61) | 0.60 (0.18; 1.99)                | 0.59 (0.05; 6.82)            |
| PaO <sub>2</sub> max.       | 245 | 0.84 (0.65; 1.09) | 0.89 (0.66; 1.19)                | 0.66 (0.38; 1.17)            |
| PaCO <sub>2</sub> at rest   | 266 | 1.07 (0.83; 1.37) | 1.13 (0.86; 1.47)                | 0.77 (0.41; 1.45)            |
| PaCO <sub>2</sub> max.      | 172 | 0.86 (0.63; 1.17) | 0.86 (0.60; 1.24)                | 0.82 (0.43; 1.57)            |

For continuous exposures, HRs are expressed for a change of 1 standard deviation.

6-MWD = six-minute walk distance; CI = confidence interval; DLCO = diffusion capacity of the lung for carbon monoxide; FEV1 = forced expiratory volume in 1 second; FVC = forced vital capacity; HR = hazard ratio; KCO = carbon monoxide transfer coefficient (diffusion capacity of the lung for carbon monoxide related to alveolar volume); LVEF = left ventricular ejection fraction; max. = maximum; MVV = maximum voluntary ventilation; P(A-a)O<sub>2</sub> = alveolar to arterial oxygen gradient; PaCO<sub>2</sub> = partial pressure of carbon dioxide; P(a-ET)O<sub>2</sub>, arterial to end-tidal carbon dioxide gradient; PAH = pulmonary arterial hypertension; PaO<sub>2</sub> = partial pressure of oxygen; PAPm = mean pulmonary artery pressure; PETCO<sub>2</sub> = end-tidal partial pressure of carbon dioxide; pred. = predicted; PVR = pulmonary vascular resistance; RAPm = mean right atrial pressure; RV = residual volume; RVSP = right ventricular systolic pressure; SvO<sub>2</sub> = mixed venous oxygen saturation; TAPSE = tricuspid annular plane systolic excursion; TLC = total lung capacity; TPR = total pulmonary resistance; VCO<sub>2</sub> = carbon dioxide output; VE = minute ventilation; VO<sub>2</sub> = oxygen uptake; VT1 = ventilatory threshold 1 (anaerobic threshold); WHO = World Health Organization.

\* $P < .05$
